# Supplementary material for: X-ray microtomography–based atlas of mouse cranial development
Source: PubMed Central journal article supplement (PMC7936920; doi:10.1093/gigascience/giab012), 2021-03-02
Supplement: giab012_reviewer_3_report_revision_1.pdf [file giab012_reviewer_3_report_revision_1.pdf]

## Reviewer Report

**Title:** X-ray microtomography-based atlas of mouse cranial development

**Version:** Revision 1      **Date:** 1/13/2021

**Reviewer name:** Chris Armit

### Reviewer Comments to Author:

I thank the authors for Theiler staging the mouse embryos presented in this Data Note, and for adding these details to Table 1 in the manuscript. From a reuse perspective this is a very helpful addition. In addition, I thank the authors for providing more detailed instruction on how to use the mask image data. I can confirm that, using this additional instruction, I can now visualise the mask data in Fiji/ImageJ.

Furthermore, the authors are to be commended for providing surface-rendered images (STL format) of all mouse embryo models presented in this Data Note. The surface-rendered 3D reconstructions complement the section image data and allow researchers to observe, for example, tissue shrinkage and structural deformation in the specimens as additionally noted by Reviewer 2. The surface-rendered 3D reconstructions highlight that tissue shrinkage is more prevalent in the younger (E12.5, E13.5, E14.5) models, but I consider the observed level of shrinkage completely acceptable.

A minor point is that there are a small number of zero byte section images in the data submitted to the GigaScience Database (GigaDB). For example, the following files have zero bytes:

E155/Images/E155\_0494.tif

E155/Images/E155\_0503.tif

The missing files should be submitted to GigaDB prior to publication of the manuscript.

It is my recommendation that, on provision of the missing section files, GigaScience accepts this Data Note for publication.

### Level of Interest

Please indicate how interesting you found the manuscript: Choose an item.

### Quality of Written English

Please indicate the quality of language in the manuscript: Choose an item.

### Declaration of Competing Interests

Please complete a declaration of competing interests, considering the following questions:

- Have you in the past five years received reimbursements, fees, funding, or salary from an organisation that may in any way gain or lose financially from the publication of this manuscript, either now or in the future?
- Do you hold any stocks or shares in an organisation that may in any way gain or lose financially from the publication of this manuscript, either now or in the future?
- Do you hold or are you currently applying for any patents relating to the content of the manuscript?
- Have you received reimbursements, fees, funding, or salary from an organization that holds or has applied for patents relating to the content of the manuscript?
- Do you have any other financial competing interests?
- Do you have any non-financial competing interests in relation to this paper?

If you can answer no to all of the above, write 'I declare that I have no competing interests' below. If your reply is yes to any, please give details below.

I declare that I have no competing interests.

I agree to the open peer review policy of the journal. I understand that my name will be included on my report to the authors and, if the manuscript is accepted for publication, my named report including any attachments I upload will be posted on the website along with the authors' responses. I agree for my report to be made available under an Open Access Creative Commons CC-BY license (<http://creativecommons.org/licenses/by/4.0/>). I understand that any comments which I do not wish to be included in my named report can be included as confidential comments to the editors, which will not be published.

Choose an item.

To further support our reviewers, we have joined with Publons, where you can gain additional credit to further highlight your hard work (see: <https://publons.com/journal/530/gigascience>). On publication of this paper, your review will be automatically added to Publons, you can then choose whether or not to claim your Publons credit. I understand this statement.

Yes Choose an item.
